# Supplementary material for: Facile synthesis of litchi shaped cuprous oxide and its application in the aerobic oxidative synthesis of imines
Source: Royal Society of Chemistry journal article supplement (doi:10.1039/c4ra14890h), 2015-01-01
Supplement: c4ra14890h1.pdf [file c4ra14890h1.pdf]

## *Supporting Information*

### **Facile Synthesis of Litchi Shaped Cuprous Oxide and Its Application for Aerobic Oxidative Synthesis of Imines**

Lei Bai,<sup>a,b</sup> and Zheng Dang<sup>c</sup>

<sup>a</sup> Centre of Advanced Nanocatalysis, University of Science and Technology of China, Hefei, Anhui, China, 230026 E-mail: leibai@ustc.edu.cn, baileixy2007@163.com

<sup>b</sup> Department of Chemistry, University of Science and Technology of China, Hefei, Anhui, China, 230026

<sup>c</sup> Technique centre of Hai Nan Entry-Exit inspection and Quarantine Bureau

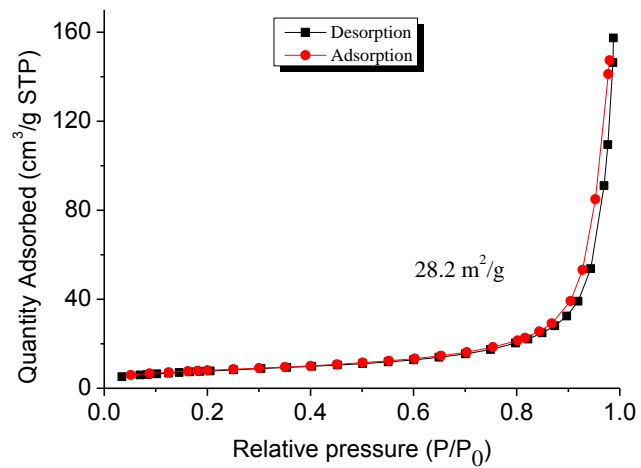

**Figure 1.** BET plot of litchi shape Cu<sub>2</sub>O nanoaggregates.

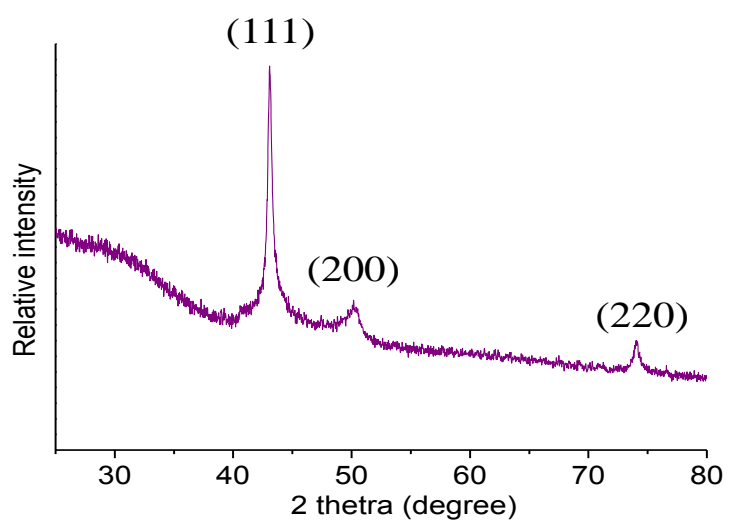

**Figure 2.** XRD pattern of Cu nanoaggregates from Cu<sub>2</sub>O nanoaggregates.

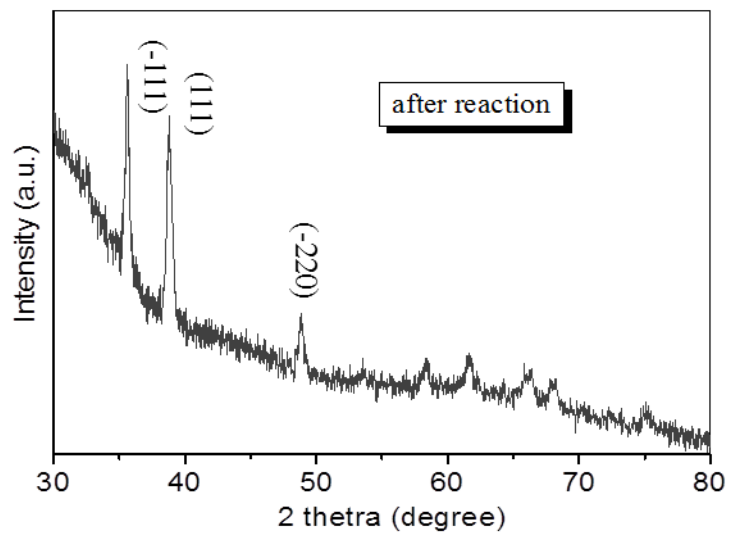

**Figure 3.** XRD pattern of  $\text{Cu}_2\text{O}$  nanoaggregates after the reaction. (the pattern denoted that the catalyst transformed into  $\text{CuO}$ )<sup>1</sup>

References:

1. Zailei Zhang, Hongwei Che, Yingli Wang, Lianying Song, Ziyi Zhong and Fabing Su, *Catal. Sci. Technol.*, 2012, 2, 1953-1960

### Leaching experiment of the catalysts in the reaction

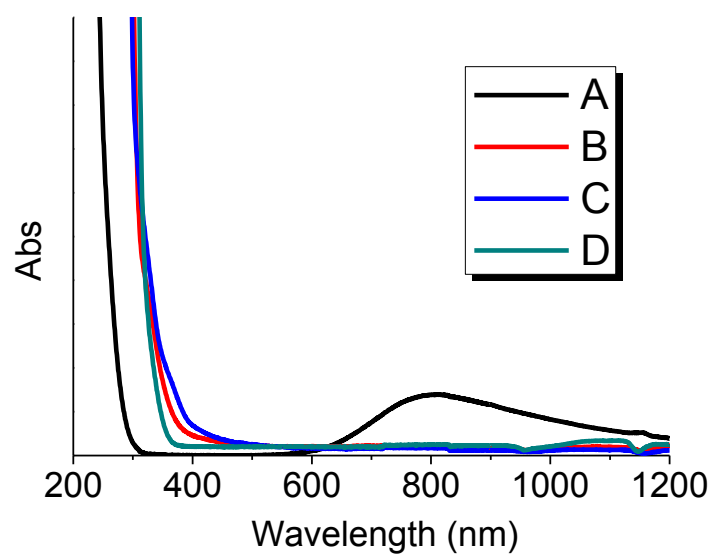

**Figure 4.** UV-Vis spectra of the reaction solutions.

- A.  $\text{Cu}^{2+}$  only in ethanol as reference
- B. Solution of entry 3 after centrifugation in Table 1
- C. Solution of entry 4 after centrifugation in Table 1
- D. Organic phase extracted by HCl in water from entry 3
